# Supplementary material
Source: PubMed Central journal article supplement (PMC9134842)
Supplement: NIHMS1805231-supplement-Miyawaki_et_al___2022__-_Supplementary_Material.pdf [file NIHMS1805231-supplement-Miyawaki_et_al___2022__-_Supplementary_Material.pdf]

## Supplementary Material

Table S1. Logistic Regression Analysis Predicting Vietnamese Older Immigrants' Depressive Symptoms (N = 132)

| Variables                                    | Model 1             | Model 2           | Model 3           | Model 4           |
|----------------------------------------------|---------------------|-------------------|-------------------|-------------------|
|                                              | OR (95% CI)         | OR (95% CI)       | OR (95% CI)       | OR (95% CI)       |
| Number of ADL disabilities                   | 1.29 (1.09, 1.54)** |                   | 1.44 (0.73, 2.81) | 1.50 (0.72, 3.13) |
| Social support                               |                     | 1.00 (0.94, 1.05) | 1.00 (0.94, 1.07) | 1.01 (0.94, 1.09) |
| ADL disabilities x Social Support            |                     |                   | 1.00 (0.97, 1.02) | 0.99 (0.96, 1.02) |
| <b>Physical Health</b>                       |                     |                   |                   |                   |
| Number of chronic conditions                 |                     |                   |                   | 2.39 (0.90, 6.34) |
| <b>Sociodemographic Characteristics</b>      |                     |                   |                   |                   |
| Age (years)                                  |                     |                   |                   | 1.02 (0.96, 1.08) |
| Gender ( <i>ref.</i> male)                   |                     |                   |                   | 1.38 (0.60, 3.17) |
| Education years                              |                     |                   |                   | 1.00 (0.92, 1.08) |
| Living arrangement ( <i>ref.</i> live alone) |                     |                   |                   |                   |
| Live with others                             |                     |                   |                   | 1.25 (0.43, 3.62) |

Note: OR = Odds Ratios; CI = Confidence Interval; \*\* $p < .01$ ; all covariates included in the models were presented here.

Table S2. Logistic Regression Analysis Predicting Vietnamese Older Immigrants' Feeling of Loneliness (N = 128)

| Variables                                    | Model 1<br>OR (95% CI) | Model 2<br>OR (95% CI) | Model 3<br>OR (95% CI) | Model 4<br>OR (95% CI) |
|----------------------------------------------|------------------------|------------------------|------------------------|------------------------|
| Number of ADL disabilities                   | 1.26 (1.03, 1.53)*     |                        | 1.93 (0.87, 4.31)      | 1.91 (0.81, 4.53)      |
| Social support                               |                        | 0.92 (0.85, 0.98)*     | 0.94 (0.86, 1.03)      | 0.94 (0.86, 1.04)      |
| ADL disabilities x Social Support            |                        |                        | 0.98 (0.94, 1.02)      | 0.98 (0.95, 1.02)      |
| <b>Physical Health</b>                       |                        |                        |                        |                        |
| Number of chronic conditions                 |                        |                        |                        | 0.78 (0.23, 2.65)      |
| <b>Sociodemographic Characteristics</b>      |                        |                        |                        |                        |
| Age (years)                                  |                        |                        |                        | 0.96 (0.87, 1.05)      |
| Gender ( <i>ref.</i> male)                   |                        |                        |                        | 1.75 (0.51, 5.99)      |
| Education years                              |                        |                        |                        | 1.00 (0.90, 1.11)      |
| Living arrangement ( <i>ref.</i> live alone) |                        |                        |                        |                        |
| Live with others                             |                        |                        |                        | 0.60 (0.16, 2.22)      |

Note: OR = Odds Ratios; CI = Confidence Interval; \* $p < .05$ . ; all covariates included in the models were presented here.
